# Supplementary figures and images for: The elevated preoperative platelet-to-lymphocyte ratio predicts poor prognosis in breast cancer patients
Source: PubMed Central journal article supplement — Br J Cancer. 2014 Mar 27;110(10):2524–30. doi: 10.1038/bjc.2014.163 (PMC4021515; doi:10.1038/bjc.2014.163), 2014-03-27

## PLR

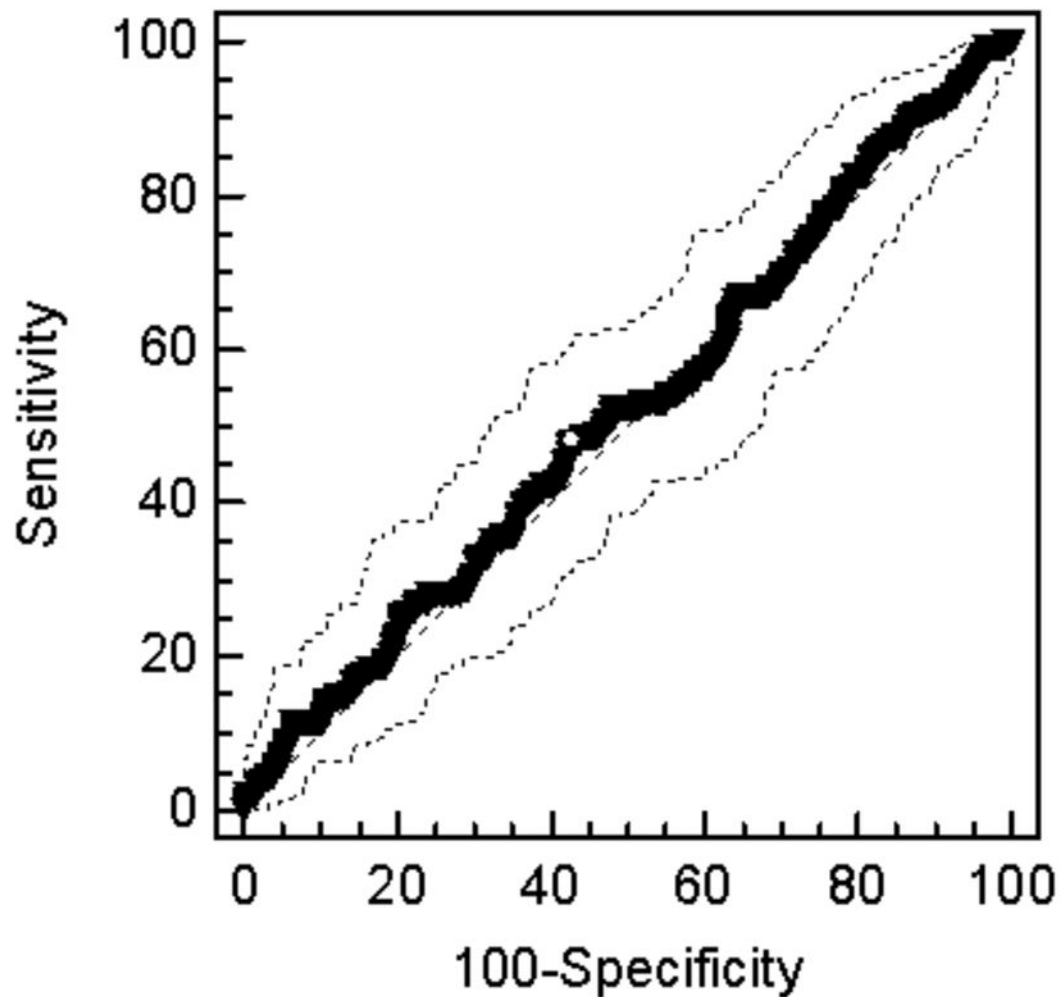

Supplement: bjc2014163x1.pdf [file bjc2014163x1.pdf]
